# Supplementary material for: Accurate estimation of the photoelectric conversion efficiency of a series of anthracene-based organic dyes for dye-sensitized solar cells
Source: Royal Society of Chemistry journal article supplement (doi:10.1039/c9tc05967a), 2019-12-23
Supplement: c9tc05967a1.pdf [file c9tc05967a1.pdf]

## Electronic Supplementary Information

Accurate estimation on photoelectric conversion  
efficiency of a series of anthracene-based organic dyes  
for dye-sensitized solar cells

Panpan Heng, Lemin Mao, Xugeng Guo\*, Li Wang\* and Jinglai Zhang\*

*Institute of Upconversion Nanoscale Materials, Henan Provincial Engineering*

*Research Center of Green Anticorrosion Technology for Magnesium Alloy, College of*

*Chemistry and Chemical Engineering, Henan University, Kaifeng 475004, China*

*E-mail: xgguo@henu.edu.cn, chemwangl@henu.edu.cn, zhangjinglai@henu.edu.cn*

**Table S1** Calculated charge transfer (CT) and local excitation (LE) characteristics for the HOMO → LUMO transition of four molecules investigated in this work

| Dye      | CT    | LE    |
|----------|-------|-------|
| <b>1</b> | 0.900 | 0.100 |
| <b>2</b> | 0.836 | 0.164 |
| <b>3</b> | 0.991 | 0.009 |
| <b>4</b> | 0.899 | 0.101 |

**Table S2** Calculated vertical excitation energy ( $E_v$ ), absorption wavelength ( $\lambda$ ), oscillator strength ( $f$ ), and major composition of MOs for all dyes at the TD-CAM-B3LYP/6-31G(d,p) level in tetrahydrofuran solvent

| Dye      | State          | $E_v$ (eV) | $\lambda$ (nm) | $f$   | Main configuration             |
|----------|----------------|------------|----------------|-------|--------------------------------|
| <b>1</b> | S <sub>1</sub> | 2.52       | 493            | 0.937 | H → L (82%); H → L+1 (11%)     |
| <b>2</b> | S <sub>1</sub> | 2.89       | 429            | 0.319 | H → L (6%); H → L+1 (89%)      |
|          | S <sub>2</sub> | 3.50       | 355            | 1.167 | H-2 → L+1 (47%); H-1 → L(44%)  |
| <b>3</b> | S <sub>1</sub> | 2.25       | 552            | 1.751 | H-1 → L (80%); H → L (13%)     |
|          | S <sub>4</sub> | 3.26       | 380            | 0.405 | H-3 → L (45%); H-1 → L+1 (26%) |
| <b>4</b> | S <sub>1</sub> | 2.02       | 613            | 1.199 | H → L (80%); H-1 → L (11%)     |
|          | S <sub>3</sub> | 2.98       | 417            | 0.595 | H-2 → L (60%); H-3 → L (13%)   |

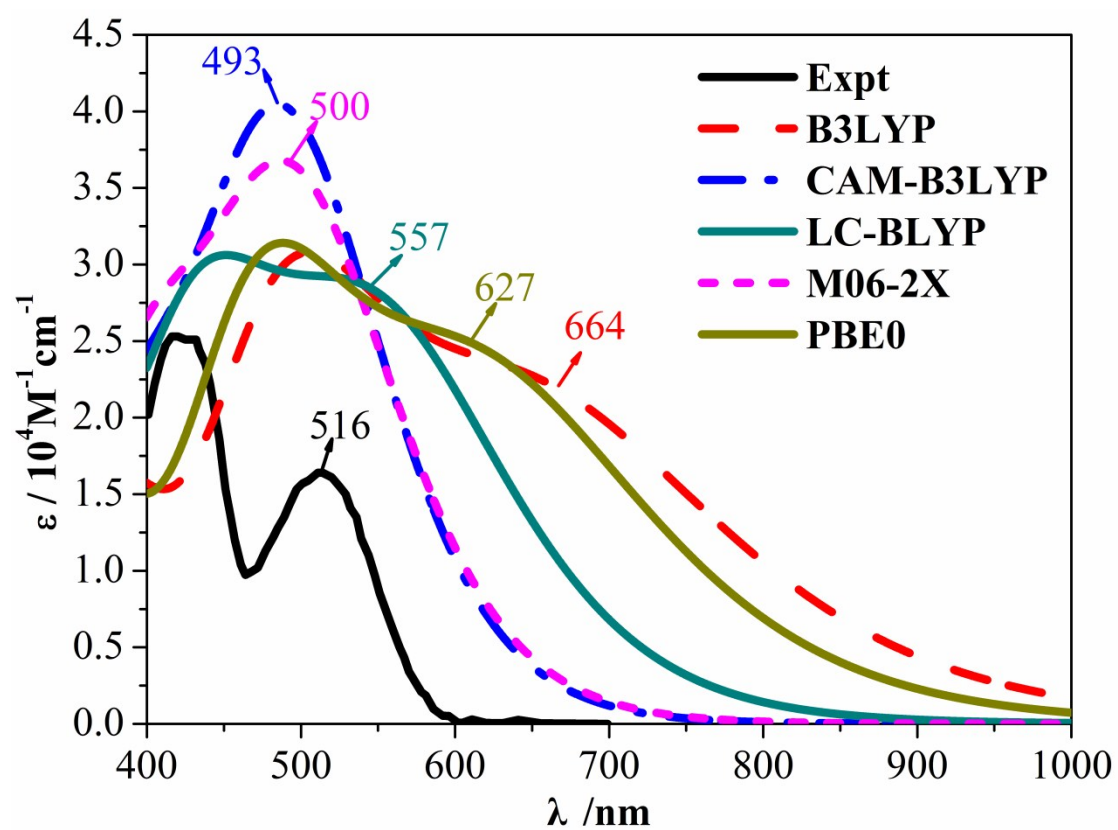

**Fig. S1** The absorption spectra of dye **1** calculated by B3LYP, CAM-B3LYP, LC-BLYP, M06-2X, and PBE0 functionals and the 6-31G(d,p) basis set in tetrahydrofuran along with the experimental value.

**Table S3** Calculated total energies of isolated dye ( $E_{\text{dye}}$ ), pure  $\text{TiO}_2$  ( $E_{\text{TiO}_2}$ ), and dye@ $\text{TiO}_2$  complex ( $E_{\text{dye+TiO}_2}$ ), as well as the adsorption energy ( $E_{\text{ads}}$ )

| Dye      | $E_{\text{dye+TiO}_2}$ (eV) | $E_{\text{dye}}$ (eV) | $E_{\text{TiO}_2}$ (eV) | $E_{\text{ads}}$ (eV) <sup>a</sup> |
|----------|-----------------------------|-----------------------|-------------------------|------------------------------------|
| <b>1</b> | -4443.30                    | -595.72               | -3846.98                | -0.60                              |
| <b>2</b> | -4565.61                    | -715.53               | -3846.98                | -3.10                              |
| <b>3</b> | -4649.14                    | -799.80               | -3846.98                | -2.36                              |
| <b>4</b> | -4689.27                    | -839.65               | -3846.98                | -2.64                              |

$$^a E_{\text{ads}} = E_{\text{dye+TiO}_2} - (E_{\text{dye}} + E_{\text{TiO}_2}).$$
